# Supplementary material for: Arginase-1–Expressing Macrophages Suppress Th2 Cytokine–Driven Inflammation and Fibrosis
Source: PubMed Central journal article supplement (PMC2660425; doi:10.1371/journal.ppat.1000371), 2009-04-10

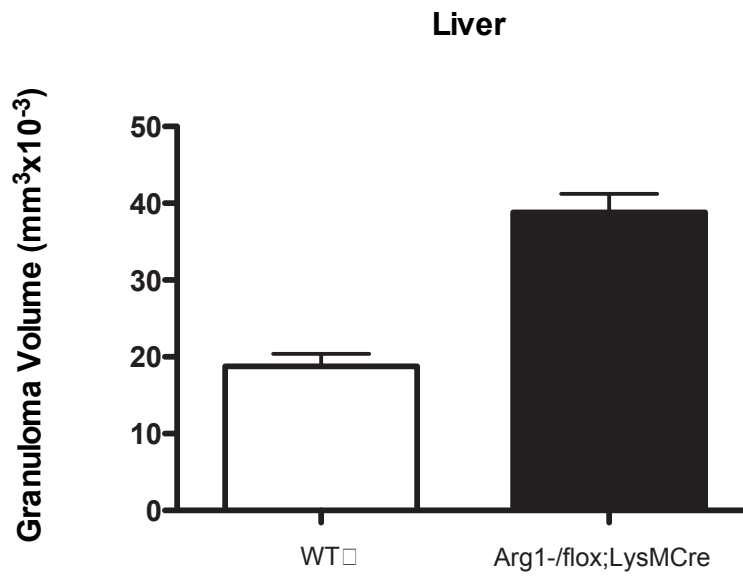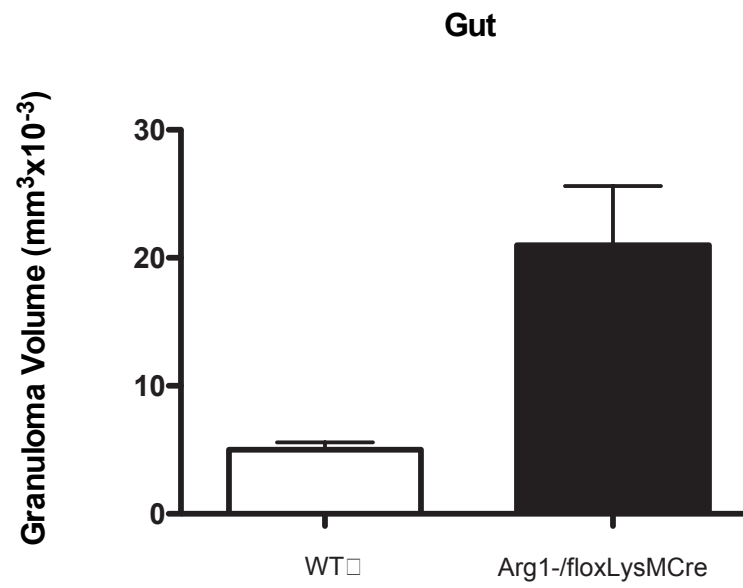

Supplement: ppat.1000371.s001.pdf [file ppat.1000371.s001.pdf]
