# Supplementary material for: Arginase-1–Expressing Macrophages Suppress Th2 Cytokine–Driven Inflammation and Fibrosis
Source: PubMed Central journal article supplement (PMC2660425; doi:10.1371/journal.ppat.1000371), 2009-04-10
Supplement: ppat.1000371.s003.pdf [file ppat.1000371.s003.pdf]

Supplemental Table 1-- Parasite Burden for control and Arg1<sup>-flox</sup>;lysMcre mice after 9, 12, and 22 weeks of infection with *S. mansoni*

|         |                                | Worm Pairs<br>(Ave±SEM) | Eggs/Worm Pair<br>(Thousands) | Liver Eggs<br>(1000s) | Gut Eggs<br>(1000s) |
|---------|--------------------------------|-------------------------|-------------------------------|-----------------------|---------------------|
| Week 9  | Control                        | 5.00±0.77               | 5.30±0.71                     | 17.25±3.03            | 5.99±1.06           |
|         | Arg1 <sup>-flox</sup> ;lysMcre | 3.22±0.49               | 4.60±0.46                     | 9.92±1.25             | 3.53±0.63           |
| Week 12 | Control                        | 2.37±0.27               | 13.99±1.17                    | 55.90±8.40            | 2.99±0.91           |
|         | Arg1 <sup>-flox</sup> ;lysMcre | 3.43±0.61               | 14.99±0.77                    | 37.70±6.40            | 3.33±1.05           |
| Week 22 | Control                        | 3.00±0.42               | 22.54±5.19                    | 49.70±4.60            | ND                  |
|         | Arg1 <sup>-flox</sup> ;lysMcre | 2.90±0.36               | 25.70±4.10                    | 63.60±9.70            | ND                  |

ND - Not determined
